# Supplementary material for: Unusually slow proton transfer dynamics of a 3-hydroxychromone dye in protic solvents
Source: Royal Society of Chemistry journal article supplement (doi:10.1039/b906710h), 2009-09-21
Supplement: b906710h.pdf [file b906710h.pdf]

## Electronic supplementary information (ESI)

# An unusually slow proton transfer dynamics of a 3-hydroxychromone dye in protic solvents

*Ranjan Das, Andrey S. Klymchenko, Guy Duportail, Yves Mély*

## 1. Spectroscopic data.

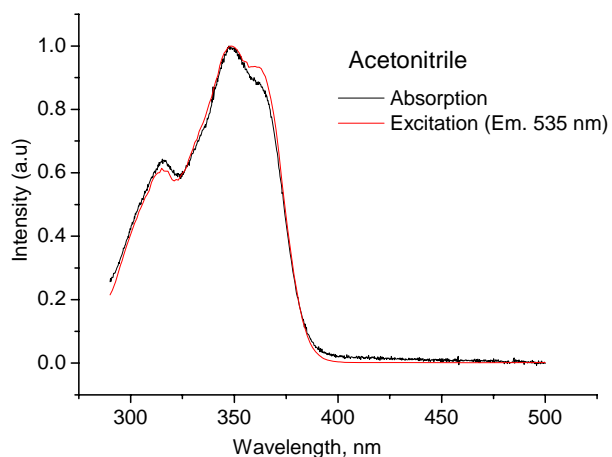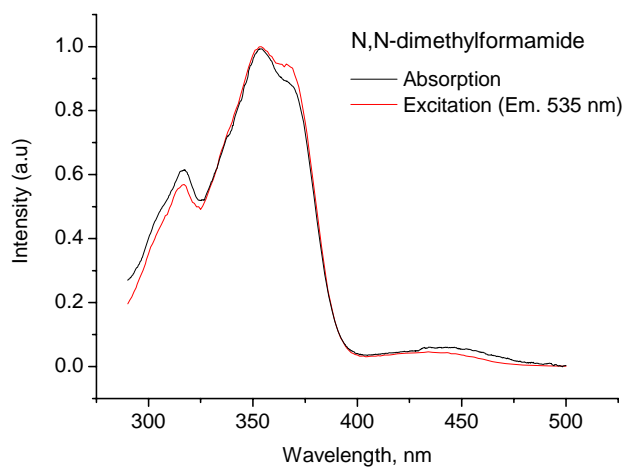

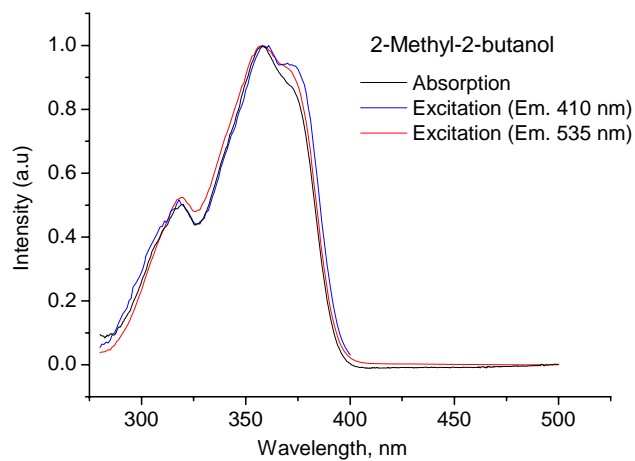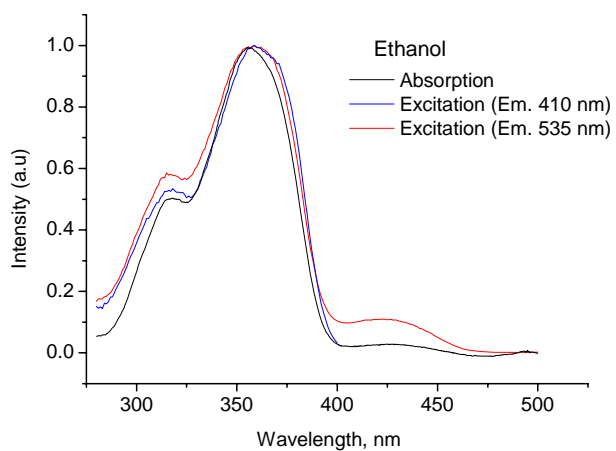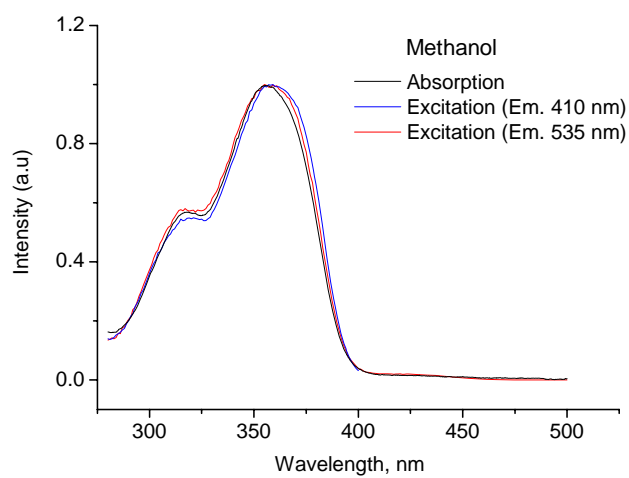

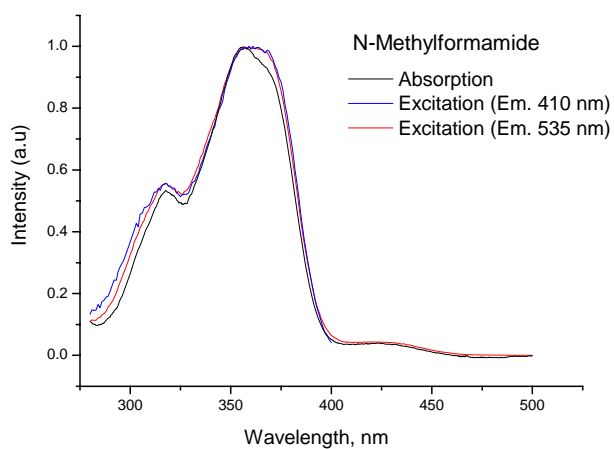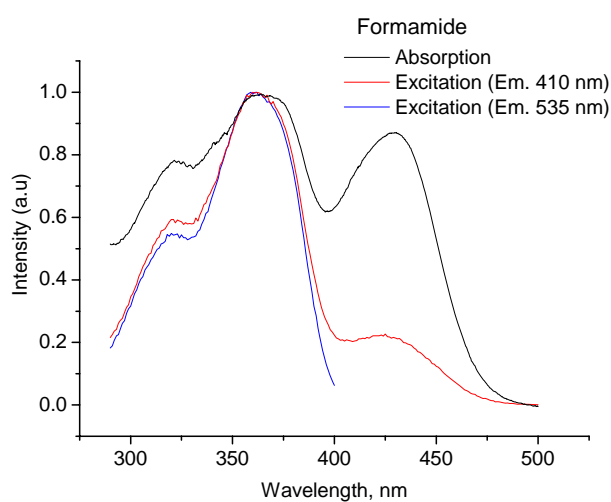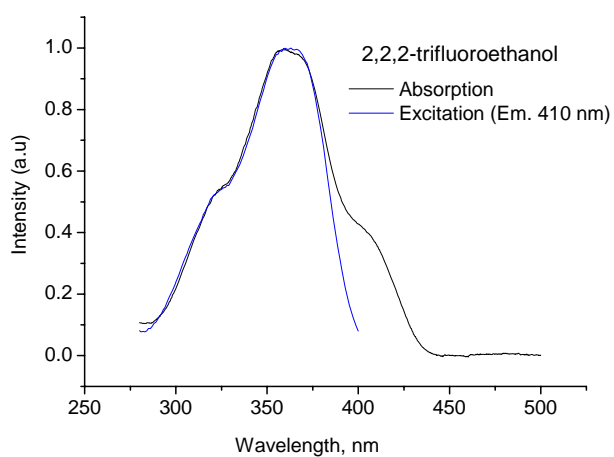

Fig. S1. Absorption and fluorescence excitation spectra of dye FHC in different organic solvents. For comparison, all the spectra were normalized at the maximum.

## 2. Models of ESIPT Dynamics

### A. Model of irreversible ESIPT.

The model of an irreversible ESIPT reaction<sup>26</sup> is illustrated in Scheme.2, where the rate constant for the reverse proton transfer ( $k_{PT}$ ) is neglected for an excited-state reaction between the  $N^*$  and  $T^*$  forms and it is also assumed that once the excited tautomer ( $T^*$ ) species is formed, only radiative ( $k_R^{T^*}$ ) or nonradiative ( $k_{NR}^{T^*}$ ) processes will depopulate this excited state.

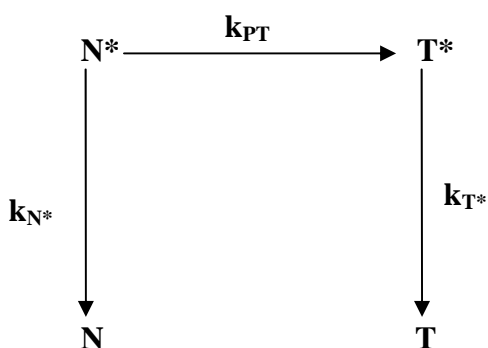

**Scheme S1.**  $k_{PT}$  : rate constant for the ESIPT reaction ;  $k_{N^*}$  and  $k_{T^*}$  are the decay rate constants of the  $N^*$  the  $T^*$  excited forms respectively

The time-dependent populations of  $N^*$  and  $T^*$  are given by

$$d[N^*]/dt = -(k_{N^*} + k_{PT}) [N^*] = -(k_R^{N^*} + k_{NR}^{N^*} + k_{PT}) [N^*] \quad (1)$$

$$d[T^*]/dt = -k_{T^*} [T^*] + k_{PT} [N^*] = -(k_R^{T^*} + k_{NR}^{T^*}) [T^*] + k_{PT} [N^*] \quad (2)$$

where  $k_R^{N^*}$ ,  $k_{NR}^{N^*}$ ,  $k_R^{T^*}$ ,  $k_{NR}^{T^*}$  are the radiative and non-radiative decay rate constants for the  $N^*$  and  $T^*$  excited forms, respectively, and  $k_{PT}$  is the rate constant for the forward intramolecular proton transfer reaction.

Solution of Eqs (1) and (2) using appropriate boundary conditions yields the observed monophasic  $N^*$  and biphasic  $T^*$  emission decay kinetics described by Eqs (3) and (4) respectively.

$$[N^*(t)] = [N^*]_0 \exp(-t/\tau_1) \quad (3)$$

$$[T^*(t)] = [N^*]_0 (k_{PT}/k_{T^*} - k) [\alpha \exp(-t/\tau_1) + \beta \exp(-t/\tau_2)] \quad (4)$$

where  $\alpha = -\beta = (k_{PT}/k_{T^*} - k)$ ,  $k = k_{N^*} + k_{PT}$ , and  $\tau_1$  and  $\tau_2$  are the fast and slower decay times, respectively. The decay times are expressed in the following manner.

$$\tau_1 = 1/k = 1/(k_R^{N^*} + k_{NR}^{N^*} + k_{PT}) \quad (5) ; \quad \tau_2 = 1/(k_R^{T^*} + k_{NR}^{T^*}) \quad (6)$$

The expressions of quantum yields for the  $N^*$  and  $T^*$  emission bands are:

$$\phi_{N^*} = k_R^{N^*} \tau_1 \quad (7)$$

$$\phi_{T^*} = k_R^{T^*} \tau_2 (k_{PT} \tau_1) \quad (8)$$

$\phi_{N^*}$  and  $\tau_1$  are determined from the steady-state fluorescence emission spectra and time-resolved fluorescence decay measurements, respectively which enable us to obtain the values of  $k_R^{N^*}$  from Eqn 1 for 2FHC in alcohols and amides (Table-3). The sum of the nonradiative and ESIPT rate constant are obtained from the following equation

$$k_{NR}^{N^*} + k_{PT} = (1 - \phi_{N^*})/\tau_1 \quad (9)$$

For the estimation of  $k_{PT}$ , the rate constant for the ESIPT reaction (Scheme.2), we used a method described in details elsewhere.<sup>26</sup> The values of  $k_{PT}$  can be obtained directly from the sum of  $k_{NR}^{N^*}$  and  $k_{PT}$  if  $k_{PT} \gg k_{NR}^{N^*}$ . The ratio  $k_{PT}/k_{NR}^{N^*}$  for a particular solvent 1 is expressed as:

$$k_{PT}^1/k_{NR}^{N^*1} \approx a/b-a \quad (10)$$

where  $a = k_{PT}^1/k_{PT}^2$ ,  $b = (k_{NR}^{N^*1} + k_{PT}^1)/(k_{NR}^{N^*2} + k_{PT}^2)$

$k_{PT}^1$ ,  $k_{PT}^2$  are the ESIPT rate constants in the first and second solvent, respectively ;  $k_{NR}^{N^*1}$  and  $k_{NR}^{N^*2}$  are the nonradiative decay rate constants for the  $N^*$  excited form in the first and second solvent, respectively.

The ratio  $k_{PT}/k_{NR}^{N^*}$  for 2FHC in alcohols and amides was estimated to be  $> 2.5$  using Eq 10. In consequence,  $k_{PT} > 0.7(k_{NR}^{N^*} + k_{PT})$ , so that the value of  $k_{PT}$  varies between  $0.7(k_{NR}^{N^*} + k_{PT})$  and  $(k_{NR}^{N^*} + k_{PT})$ , which enables us to estimate the magnitude and error in the estimation of  $k_{PT}$  (Table 3).

## B. Model of reversible ESIPT

The following model (Scheme-3) of a reversible ESIPT reaction<sup>27</sup> between  $N^*$  and  $T^*$  species is used for evaluating the kinetic parameters associated with the reversible proton transfer process of 2FHC in N-methylformamide.

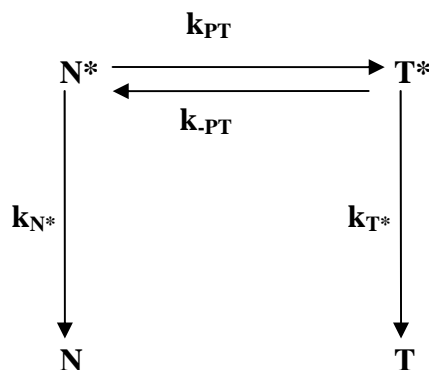

**Scheme S2.**  $k_{PT}$ ,  $k_{PT}$  are the rate constants for the forward and reverse ESIPT reactions, respectively ;  $k_{N^*}$ ,  $k_{T^*}$  are the decay rate constants of the  $N^*$  and  $T^*$  forms respectively

For such a reversible ESIPT reaction (Scheme-2), the time-dependent populations of the  $N^*$  and  $T^*$  forms are described by:

$$d[N^*]/dt = - (k_R^{N^*} + k_{NR}^{N^*} + k_{PT}) [N^*] + k_{PT} [T^*] \quad (11)$$

$$d[T^*]/dt = -(k_R^{T^*} + k_{NR}^{T^*}) [T^*] + k_{PT} [N^*] \quad (12)$$

where  $k_{N^*} = k_R^{N^*} + k_{NR}^{N^*}$  and  $k_{T^*} = k_R^{T^*} + k_{NR}^{T^*}$

Solution of Eqn (11) and (12) using appropriate boundary conditions yield the observed biphasic  $N^*$  and  $T^*$  emission decay kinetics described by Eqs (13) and (14), respectively.

$$[N^*(t)] = [N^*]_0 [\alpha_1^{N^*} \exp(-t/\tau_1) + \alpha_2^{N^*} \exp(-t/\tau_2)] \quad (13)$$

$$[T^*(t)] = [N^*]_0 [\alpha_1^{T^*} \exp(-t/\tau_1) + \alpha_2^{T^*} \exp(-t/\tau_2)] \quad (14)$$

The decay times,  $\tau_1$  and  $\tau_2$  are described by

$$\alpha_1^{N^*} = (\gamma_{N^*} - \gamma_2) / (\gamma_1 - \gamma_2) \quad (15)$$

$$\alpha_2^{N^*} = (\gamma_1 - \gamma_{N^*}) / (\gamma_1 - \gamma_2) \quad (16)$$

$$\text{where } \gamma_1, \gamma_2 = (\tau_1)^{-1}, (\tau_2)^{-1} = \frac{1}{2} \{ (\gamma_{N^*} + \gamma_{T^*}) \pm [(\gamma_{N^*} - \gamma_{T^*})^2 + 4 k_{PT} k_{-PT}]^{1/2} \} \quad (17)$$

$$\text{with } \gamma_{N^*} = k_R^{N^*} + k_{NR}^{N^*} + k_{PT} \text{ and } \gamma_{T^*} = k_R^{T^*} + k_{NR}^{T^*} + k_{-PT} \quad (18)$$

Further, the  $\gamma_{N^*}$  and  $\gamma_{T^*}$  were estimated from Eqs 17-19 by

$$\gamma_{N^*} = \gamma_2 + \alpha_1^{N^*} (\gamma_1 - \gamma_2) \quad (19)$$

$$\gamma_{T^*} = \gamma_1 - \alpha_1^{N^*} (\gamma_1 - \gamma_2) \quad (20)$$

Moreover, assuming that the rates of forward and reverse ESIPT reactions are much faster than the rate of radiative and nonradiative deactivation processes (i.e.,  $k_{PT}$ , and  $k_{-PT} \gg k_{N^*} + k_{T^*}$ ). As a result Eq 18 can be simplified as :

$$\gamma_{N^*} \approx k_{PT} \text{ and } \gamma_{T^*} \approx k_{-PT} \quad (21)$$
